# Supplementary material
Source: Springer Nature journal article supplement (https://www.springermedizin.de/resource/supplementary/13046_2008_72_MOESM3_ESM.pdf/9661456)

Survival rate

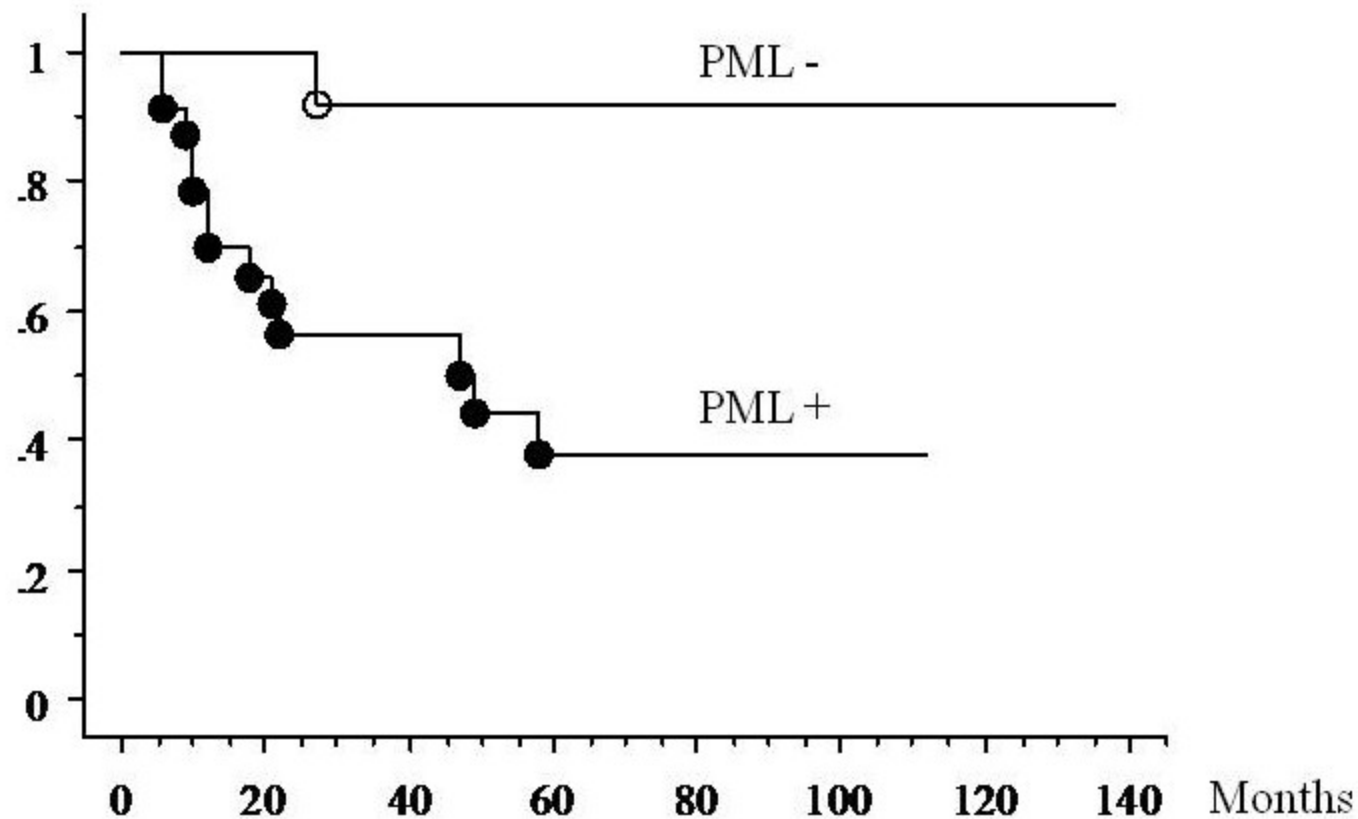

Supplement: MOESM3 [file 9661456]
